# Supplementary material for: Tetrahydroxy-anthraquinone induced structural change of zeolitic imidazolate frameworks for asymmetric supercapacitor electrode material application
Source: Royal Society of Chemistry journal article supplement (doi:10.1039/c9nj00036d), 2019-01-01
Supplement: c9nj00036d1.pdf [file c9nj00036d1.pdf]

## Electronic Supplementary Material

### **Tetrahydroxy-anthraquinone induced structural change of Zeolitic Imidazolate Framework for Asymmetric Supercapacitor Electrode Material Application**

Taotao Sun, Hao Guo\*, Liguoyue, Huiqin Chen, Mingyue Wang, Ning Wu, Hui Liu, Yuying

Yang, Wu Yang\*□

(Key Lab of Bioelectrochemistry and Environmental Analysis of Gansu Province, Key Lab of Eco-Environments Related Polymer Materials of MOE, College of Chemistry and Chemical Engineering, Northwest Normal University, Lanzhou 730070, P R China.)

#### **1. Electrochemical test**

The working electrode, counter electrode, and reference electrode refer to electrode material on nickel foam, platinum electrode, and saturated calomel electrode (SCE), separately. Electrochemical measurements were carried out on a CHI 660E electrochemical workstation (Chenhua, Shanghai, China) and a CT2001A-LAND cell test system (Landian, Wuhan, China). The electrode was prepared by following procedures: TZM(8.0 mg) or TM(8.0 mg), acetylene black (1.5 mg) and PTFE (0.5 mg) were mixed homogeneously with ethanol by sonication and coated on nickel foams (a mass ratio of 80:15:5,  $1 \times 1 \text{ cm}^2$ ). And the as-prepared electrode materials were dried at  $55^\circ\text{C}$  in vacuum for 24 h, the nickel foams were pressed under  $<15 \text{ MPa}$  for 20 s. Then the loading mass of active substance was measured to be about 2.0 mg.

---

\* Corresponding author.

E-mail address: xbsfda123@126.com(W. Yang), haoguo12@126.com(H. Guo).

TZM and TM were studied in 3 M and 6 M KOH electrolyte. Cyclic voltammetry (CV) test was done at the scan rates of 10, 20, 30, 40, and 50  $\text{mV}\cdot\text{s}^{-1}$ . Galvanostatic charge-discharge(GCD) curves were obtained at the current densities of 1.0, 2.0, 3.0, 4.0 and 5.0  $\text{A}\cdot\text{g}^{-1}$ . Electrochemical impedance spectroscopy (EIS) measurement were carried out in the frequency ranging from 0.01~100 KHz. The capacitance was calculated by the following equation [33]:

$$C = \frac{I\Delta t}{m\Delta V} \quad (1)$$

TZM//ACS aqueous asymmetric capacitor was constructed by using 1 M KOH aqueous electrolyte. The weight ratio of positive and negative is decided by the following charge balance equations:

$$Q_+ = Q_- \quad (2)$$

$$\frac{m_+}{m_-} = \frac{\Delta V_- \cdot C_-}{\Delta V_+ \cdot C_+} \quad (3)$$

The mass of electroactive substance (The mass loading are 2.0 mg and 1.1 mg for positive and negative electrodes, respectively): acetylene black: PTFE binder = 80:15:5. The specific energy density and power density derived from GCD test can be calculated from the equations:

$$C_T = \frac{I\Delta t}{m_T\Delta V} \quad (4)$$

$$SE = \frac{C_s\Delta V^2}{2 \times 3.6} \quad (5)$$

$$SP = \frac{3600 \times SE}{\Delta t} \quad (6)$$

The  $C_T$ ,  $I$ ,  $m_T$ ,  $\Delta t$  and  $\Delta V$  refer to the specific capacitance ( $\text{F}\cdot\text{g}^{-1}$ ), current density (A), charge-discharge time (s), the total mass of negative and positive electrode materials (g) and potential (V) of TZM//ACS asymmetric aqueous supercapacitor,

respectively. The SE and SP refer to the specific energy density ( $\text{Wh}\cdot\text{kg}^{-1}$ ) and specific power density ( $\text{W}\cdot\text{kg}^{-1}$ ).

## 2. Preparation of PVA-KOH gel

The PVA-KOH gel was used as both the ionic electrolyte and separator of the all-solid-state asymmetric supercapacitor, which was prepared based on the reported procedure as follows: 1.5 g of KOH was dispersed into 30 mL deionized water, and then 3 g PVA was added under stirring until the solution became clear at  $80\text{ }^{\circ}\text{C}$ [46]. The resulting gel was poured onto a watch glass and dried in room temperature after evaporation of the excess water the jelly-like gel was solidified and cut into pieces matching the size of the electrodes, and then the all-solid-state asymmetric supercapacitor was carefully built with the solidified PVA-KOH gel.

## 3. Related figures and tables

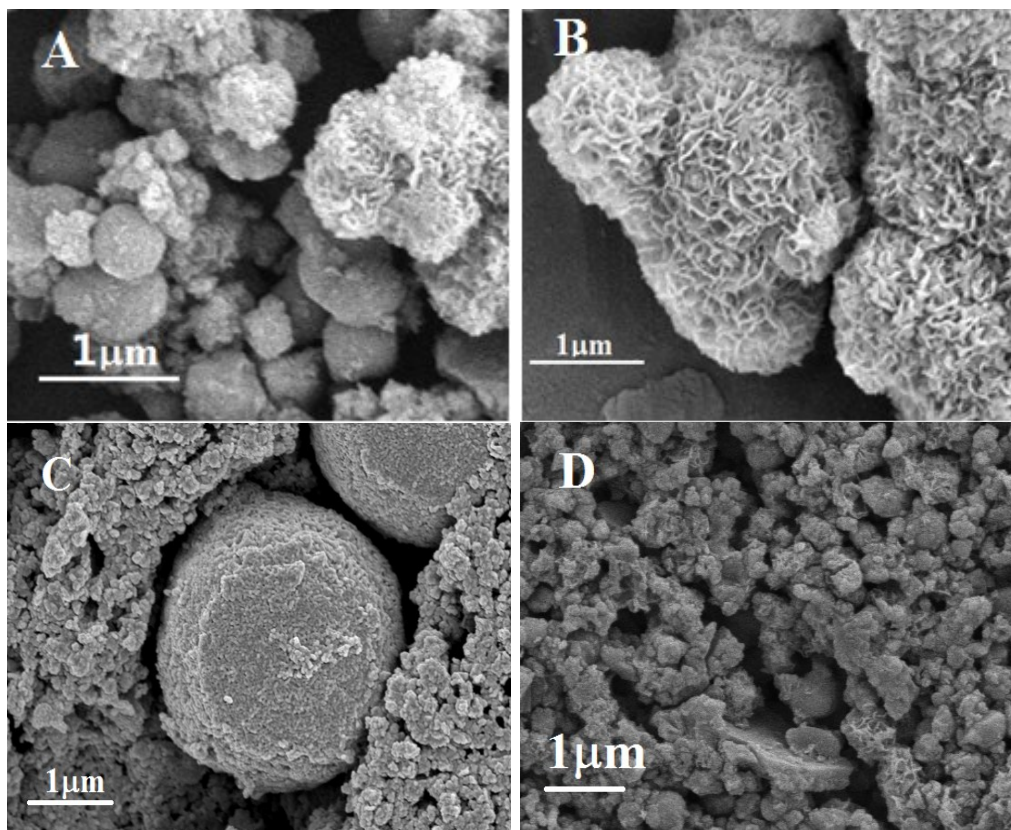

**Figure S1** SEM images of the products (TZM) prepared in 20h(A) and 48h(B); SEM images of TZM(C) and TM(D) after 2000 charging and discharging cycles

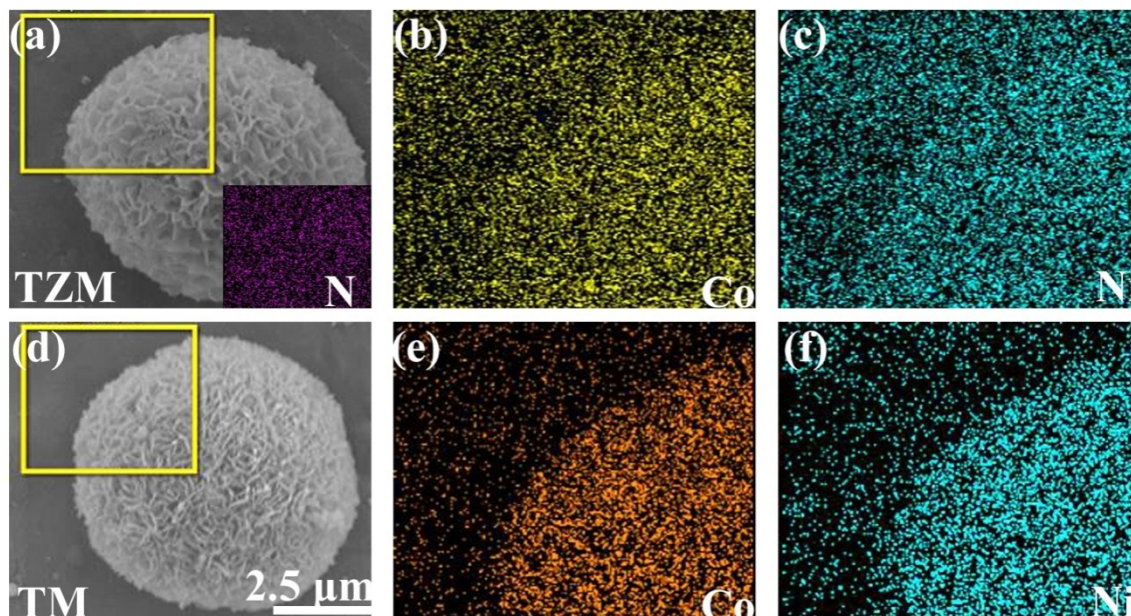

**Figure S2** EDS area mapping of the TZM (a) and TM (d), and corresponding Co (b and e), and Ni (c and f) elements, respectively (Inset is the area mapping of N).

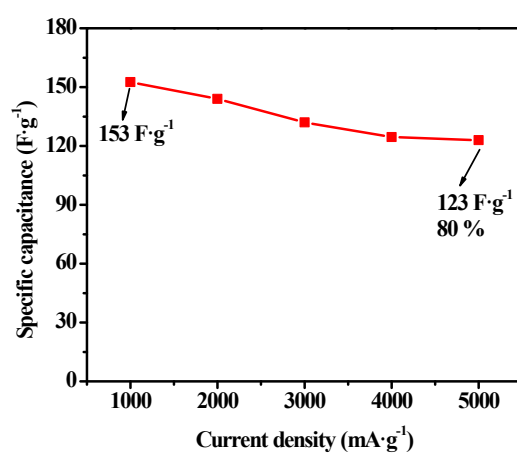

**Figure S3** Comparison of the specific capacitances of TZM//ACS aqueous asymmetric supercapacitor at various current densities

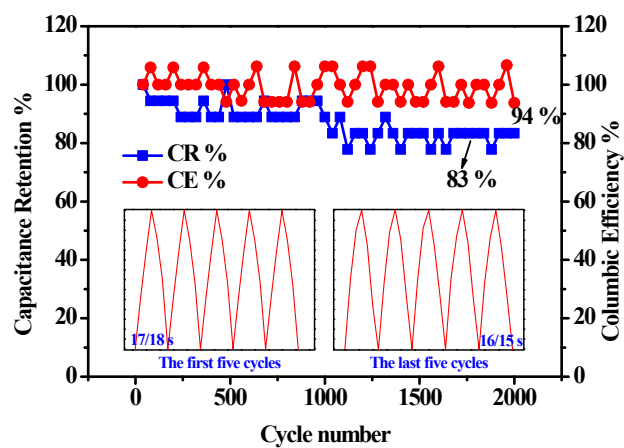

**Figure S4** Cycle stability performance for TZM//ACS aqueous asymmetric supercapacitor at the current density of  $10 \text{ A} \cdot \text{g}^{-1}$

**Table S1** Comparison of the electrochemical performances of the reported Co/Ni-ZIF and AQ-modified materials with this work

| Electrode materials    | Electrolyte                   | Current density                     | Specific capacitance                 | Cycle stability        | Refs      |
|------------------------|-------------------------------|-------------------------------------|--------------------------------------|------------------------|-----------|
| C-ZIF-8@MWCNTs         | 2 M KOH                       | $1.0 \text{ A} \cdot \text{g}^{-1}$ | $326 \text{ F} \cdot \text{g}^{-1}$  | 99.7% -10000           | [10]      |
| CNT@CZIF-2             | 6 M KOH                       | $0.5 \text{ A} \cdot \text{g}^{-1}$ | $324 \text{ F} \cdot \text{g}^{-1}$  | 93.5 % -1000           | [14]      |
| AQ/OMCs                | 1 M $\text{H}_2\text{SO}_4$   | $0.5 \text{ A} \cdot \text{g}^{-1}$ | $346 \text{ F} \cdot \text{g}^{-1}$  | -                      | [17]      |
| Ni-CoLDH-NFA           | 2 M KOH                       | $2.0 \text{ A} \cdot \text{g}^{-1}$ | $894 \text{ C} \cdot \text{g}^{-1}$  | -                      | [29]      |
| THAQ/rGO               | 1 M $\text{H}_2\text{SO}_4$   | $1.0 \text{ A} \cdot \text{g}^{-1}$ | $259 \text{ F} \cdot \text{g}^{-1}$  | 81.8% -2000            | [31]      |
| AQ/GF                  | 1 M $\text{H}_2\text{SO}_4$   | $1.0 \text{ A} \cdot \text{g}^{-1}$ | $396 \text{ F} \cdot \text{g}^{-1}$  | 97 % -2000             | [35]      |
| $\text{C}_{\text{AQ}}$ | 0.1 M $\text{H}_2\text{SO}_4$ | $10 \text{ mV} \cdot \text{s}^{-1}$ | $195 \text{ F} \cdot \text{g}^{-1}$  | 83 % -10000            | [37]      |
| AQ-HPCNTs              | 1 M $\text{H}_2\text{SO}_4$   | $1.0 \text{ A} \cdot \text{g}^{-1}$ | $710 \text{ F} \cdot \text{g}^{-1}$  | 96 % -1000             | [38]      |
| AZ-SGHs                | 1 M $\text{H}_2\text{SO}_4$   | $1.0 \text{ A} \cdot \text{g}^{-1}$ | $350 \text{ F} \cdot \text{g}^{-1}$  | -                      | [39]      |
| AQSGH                  | 1 M $\text{H}_2\text{SO}_4$   | $0.3 \text{ A} \cdot \text{g}^{-1}$ | $258 \text{ F} \cdot \text{g}^{-1}$  | 100 % -2000            | [40]      |
| ANS-rGO                | 1 M $\text{H}_2\text{SO}_4$   | $1.3 \text{ A} \cdot \text{g}^{-1}$ | $373 \text{ F} \cdot \text{g}^{-1}$  | 97.5 % -1000           | [41]      |
| TZM                    | 3 M KOH                       | $1.0 \text{ A} \cdot \text{g}^{-1}$ | $2030 \text{ F} \cdot \text{g}^{-1}$ | 90.7%-1000<br>94%-2000 | This work |

**Table S2** Comparison of the energy density (SE) and specific power density (SP) of TZM//ACS and the results reported in other literatures

| Materials                    | Electrolyte                        | SE (Wh·kg <sup>-1</sup> ) | SP (W·kg <sup>-1</sup> ) | V <sub>max</sub> (V) | Refs      |
|------------------------------|------------------------------------|---------------------------|--------------------------|----------------------|-----------|
| AQ/OMCs//OMC                 | 1 M H <sub>2</sub> SO <sub>4</sub> | 6.3                       | 18000                    | 1.2 V                | [17]      |
| AQ-C//Ru oxide               | 1 M H <sub>2</sub> SO <sub>4</sub> | 12.7                      | 17300                    | 1.3 V                | [19]      |
| Ni-Co LDH-NFA//AC            | 6 M KOH                            | 18.5                      | 17000                    | 1.7 V                | [29]      |
| GF//AQ/GF                    | 1 M H <sub>2</sub> SO <sub>4</sub> | 13.2                      | 917.4                    | 1.6 V                | [35]      |
| Co(OH) <sub>2</sub> //AC     | 1 M KOH                            | 26.4                      | 195.1                    | 1.6 V                | [36]      |
| AZ-SGHs//AZ-SGHs             | 1 M H <sub>2</sub> SO <sub>4</sub> | 18.2                      | 700                      | 1.4 V                | [39]      |
| C-AQ//C-DHB                  | 1 M H <sub>2</sub> SO <sub>4</sub> | 1.1                       | 6300                     | 1.2 V                | [45]      |
| AQ@PNCNTs//PNTs              | 1 M H <sub>2</sub> SO <sub>4</sub> | 32.7                      | 700                      | 1.4 V                | [46]      |
| rGO/Co(OH) <sub>2</sub> //AC | 1 M KOH                            | 44.6                      | 13000                    | 1.6 V                | [47]      |
| TZM//AC                      | 1 M KOH                            | 47.7                      | 750                      | 1.5 V                | This work |
